# Supplementary material
Source: publisher figshare collection journal article supplement (https://frontiersin.figshare.com/ndownloader/files/28106496)
Supplement: Supplementary file [file 28106496]

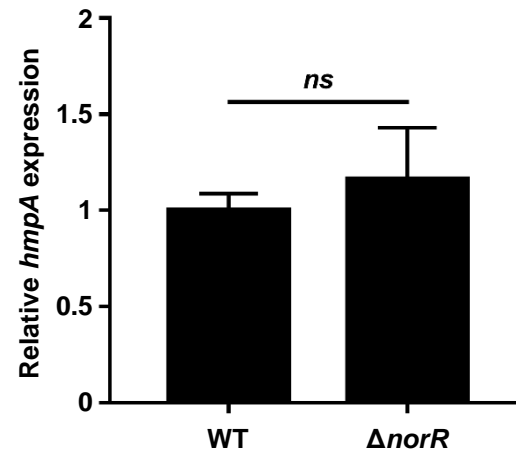

**Supplementary Figure 6.** The effect of the *norR* mutation on *hmpA* transcription. Total RNA was isolated from the wild-type strain and isogenic *norR*-deletion mutant grown aerobically to an  $A_{600}$  of 0.5. The *hmpA* transcript levels were determined by qRT-PCR, and the *hmpA* transcript level in the wild-type strain was set to 1. Error bars represent the SD. Statistical significance was determined by the Student's *t* test (*ns*, not significant). WT, wild type;  $\Delta norR$ , *norR*-deletion mutant.
